# Supplementary material
Source: PubMed Central journal article supplement (PMC3820951)
Supplement: supp_M113.028928_mcp.M113.028928-1.pdf [file supp_M113.028928_mcp.M113.028928-1.pdf]

## CID – Synthetic Library

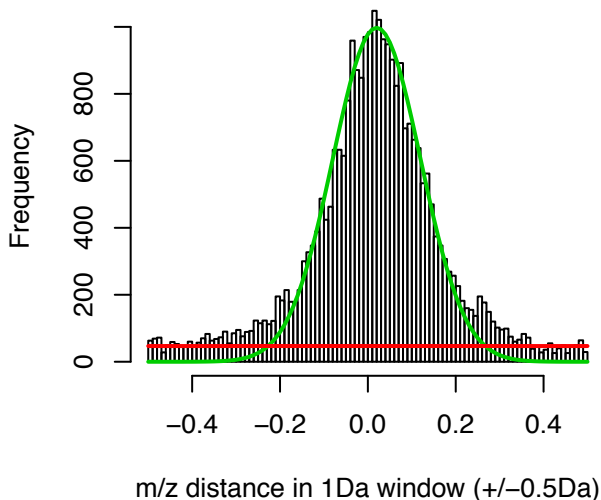

## HCD – Synthetic Library

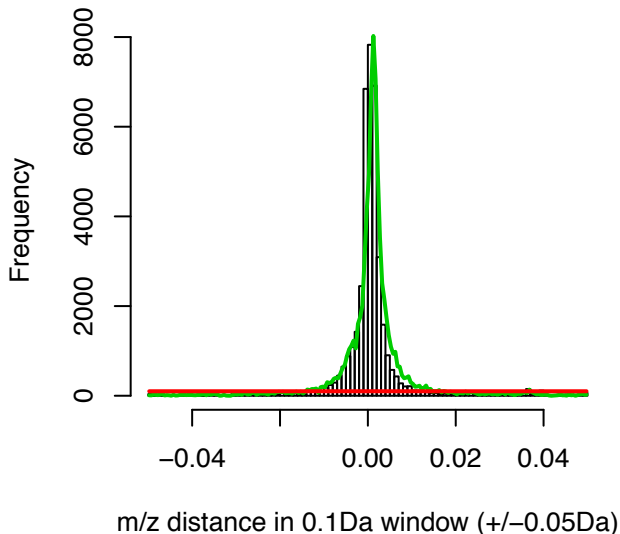

**Supplementary Figure 1.** The distribution of m/z distances (mass accuracies) between theoretical and observed peaks in appropriately sized error tolerance windows. For low mass accuracy data,  $\pm 0.25$  Da window covers the mixture of a unimodal distribution (signal peaks) and the flat distribution (noise peaks). For high mass accuracy data,  $\pm 0.025$  Da window covers the range. LuciPHOr attempts to learn these distributions from each dataset, with a user-defined mass tolerance window. Green and red lines indicate the fitted densities for matched and random peaks respectively.
