# Supplementary material
Source: PubMed Central journal article supplement (PMC3820951)
Supplement: supp_M113.028928_mcp.M113.028928-2.pdf [file supp_M113.028928_mcp.M113.028928-2.pdf]

## Murine brain (HCD)

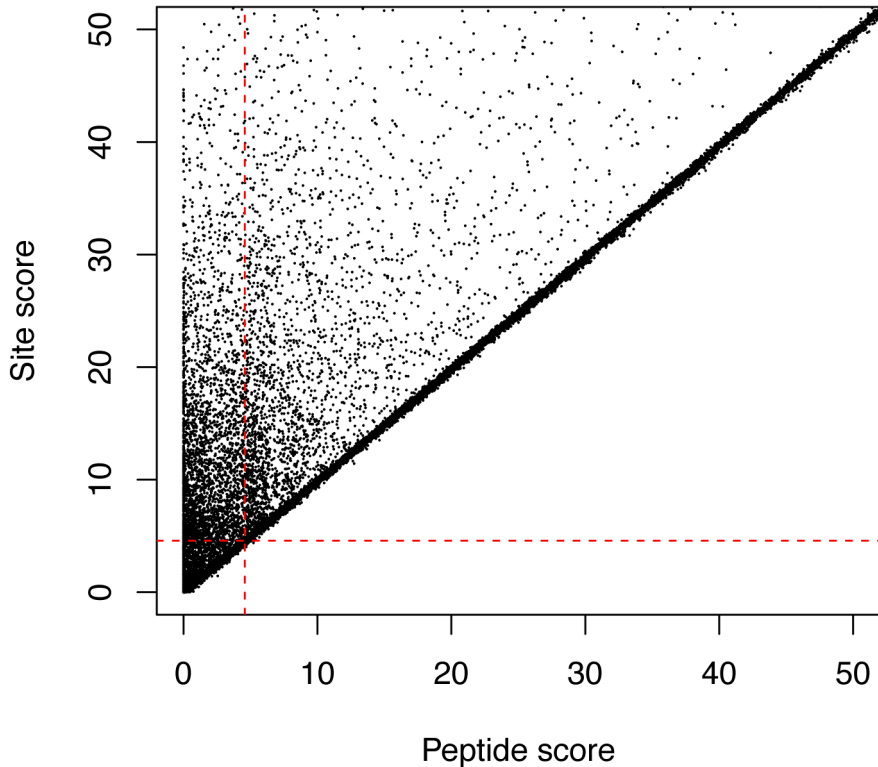

**Supplementary Figure 2.** Comparison of the site-level scores against the peptide-level scores in the mouse brain dataset. Peptide scores and site scores are on the horizontal and vertical axes, respectively. The additional sites rescued by the site scores will be identified from the area to the left of the vertical red dashed line and above the horizontal red dashed line.
